# Supplementary material for: Reprogramming Cells for Synergistic Combination Therapy with Nanotherapeutics against Uveal Melanoma
Source: MDPI journal article supplement (doi:10.3390/biomimetics3040028), 2018-09-25
Supplement: s1 [file s1]

# **Supplementary Materials: Reprogramming Cells for Synergistic Combination Therapy with Nanotherapeutics against Uveal Melanoma**

**Paula Milán Rois, Alfonso Latorre, Ciro Rodriguez Diaz, Álvaro del Moral and Álvaro Somoza\***

Instituto Madrileño de Estudios Avanzados en Nanociencia (IMDEA Nanociencia), Centro Nacional de Biotecnología (CNB-CSIC) Associated Unit, Faraday 9, 28049 Madrid, Spain; paula.milan@imdea.org (P.M.R.); alfonso.latorre@imdea.org (A.L.); ciro.rodriguez@imdea.org (C.R.D.); delmoilex@gmail.com (Á.d.M.)

\* Correspondence: alvaro.somoza@imdea.org; Tel.: +34-912-998-856

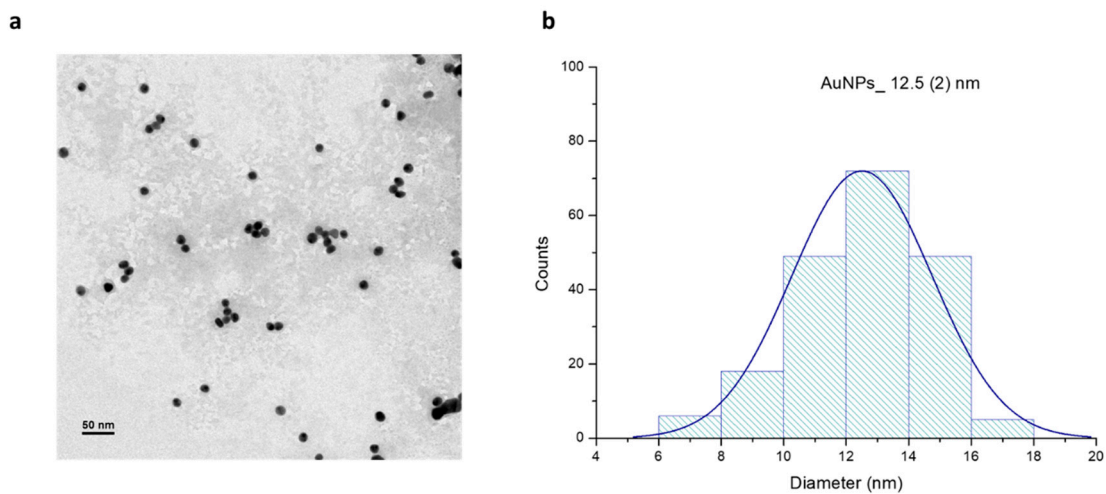

**Figure S1.** TEM analysis of AuNPs. **(a)** TEM images of AuNPs. Homogeneous size was observed. **(b)** Histogram of the sizes of the AuNP obtained. The diameter of AuNPs was  $12.5 \pm 2$  nm.

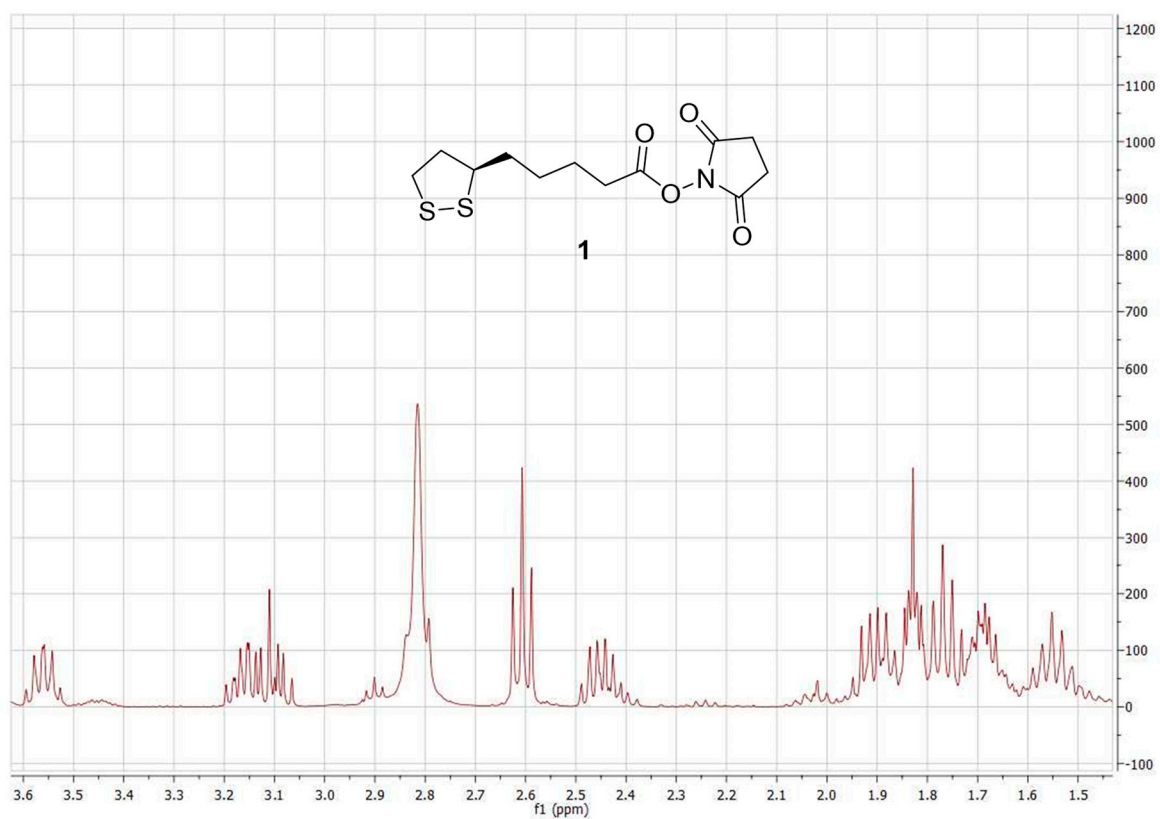

Figure S2.  $^1\text{H}$  NMR of compound 1.

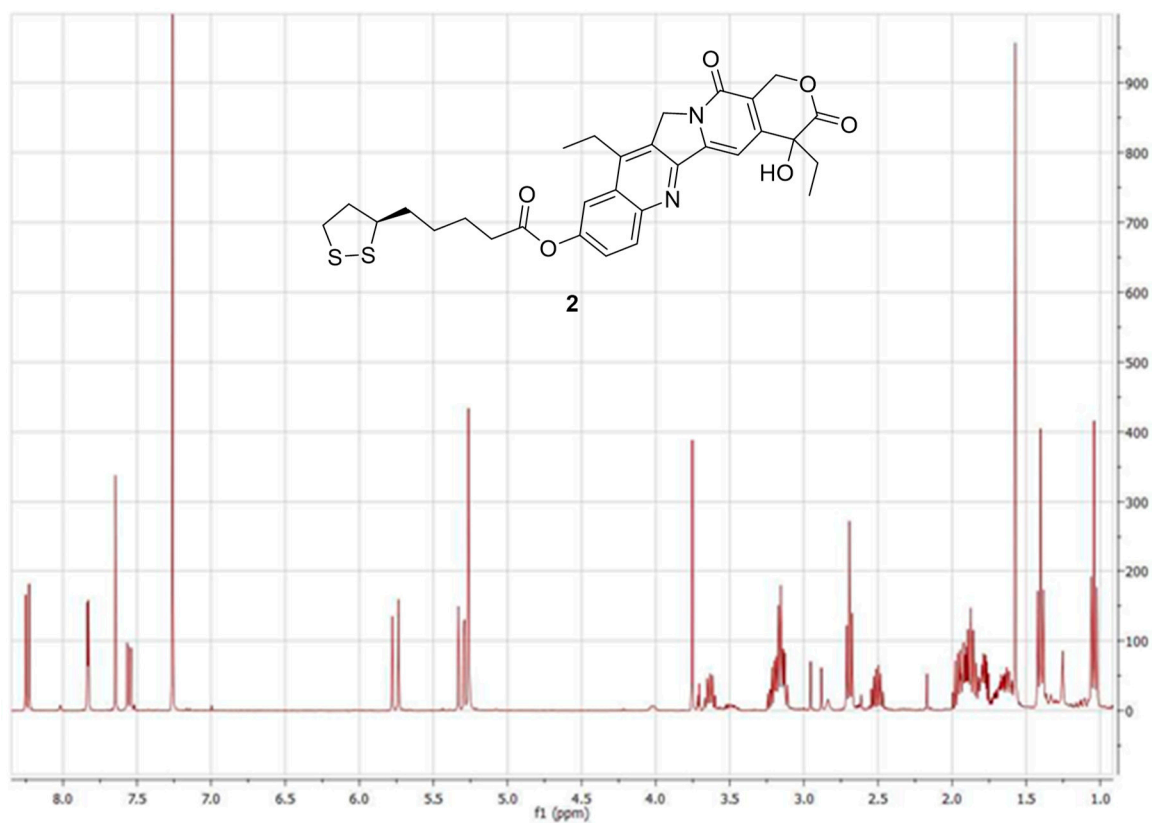

Figure S3. <sup>1</sup>H NMR of compound 2.

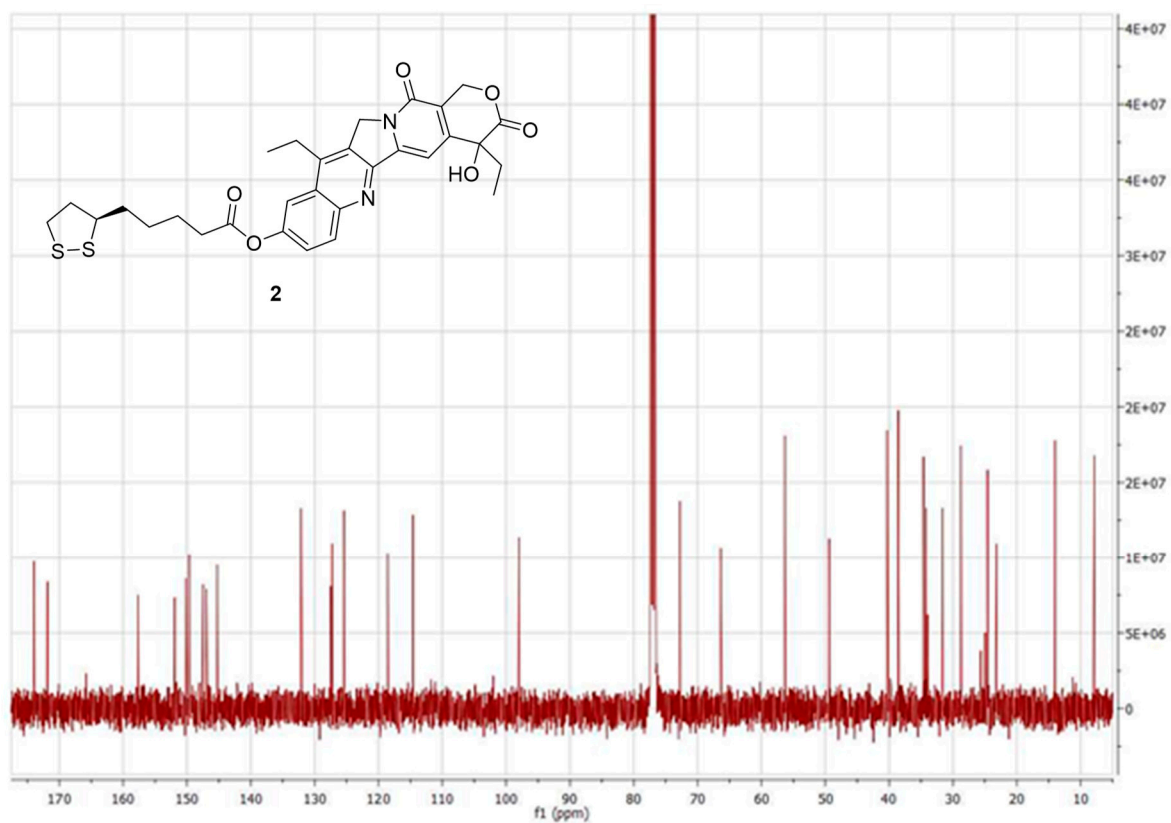

Figure S4.  $^{13}\text{C}$  NMR of compound 2.

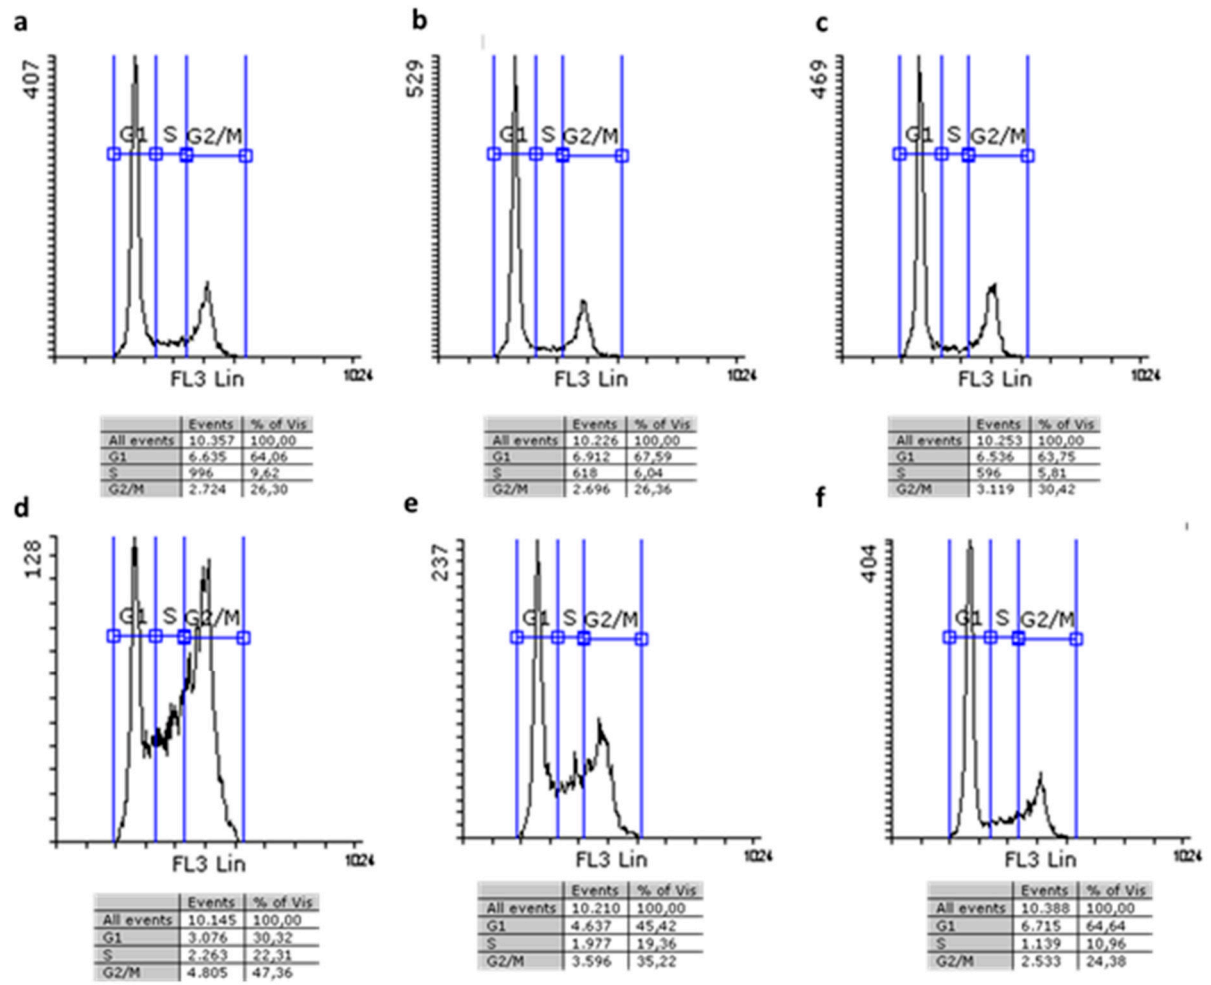

**Figure S5.** Cell cycle analysis. (a) Untreated condition; (b) AuNP DNA mix; (c) AuNP RNA mix; (d) AuNP SN38; (e) AuNP DNA mix + AuNP SN38; (f) AuNP RNA mix + AuNP SN38.

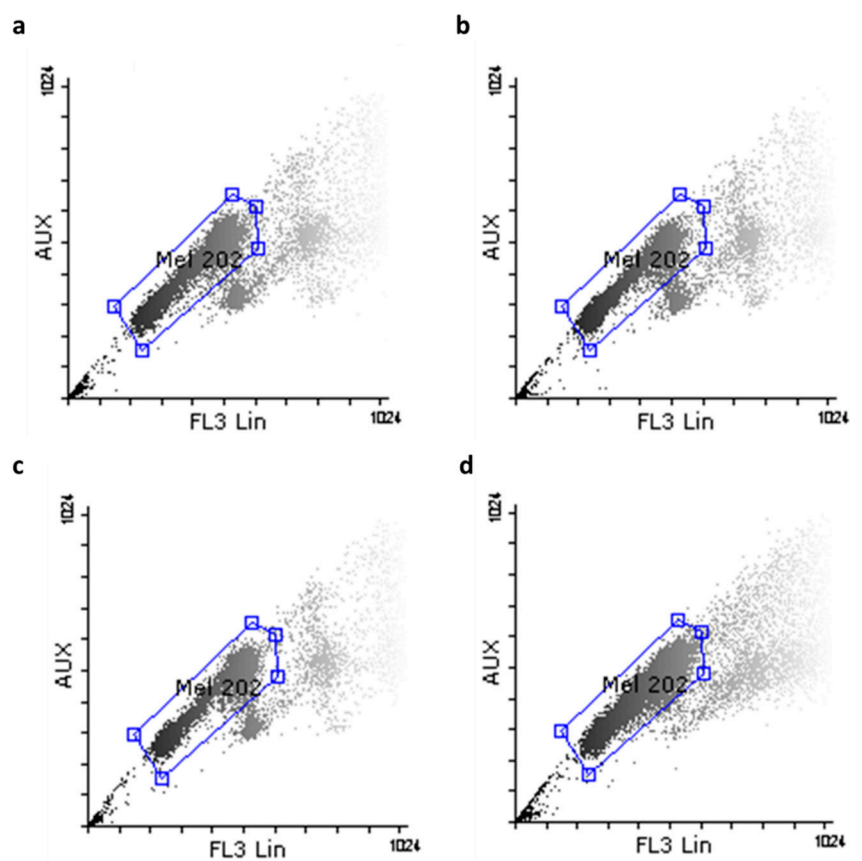

**Figure S6.** Distribution of Mel 202 cells treated with AuNPs by flow cytometry. The gate indicates the complete single cells selected for the analysis (neither membrane residues nor doublet cells). (a) AuNPs; (b) AuNPs DNA mix; (c) AuNPs siRNA mix; (d) AuNPs SN38.
